# Supplementary material
Source: PubMed Central journal article supplement (PMC3285470)
Supplement: NIHMS353898-supplement.pdf [file NIHMS353898-supplement.pdf]

# Supporting Information

## Determinants of Serum Polybrominated Diphenyl Ether (PBDE) Levels among Pregnant Women in the CHAMACOS Cohort

Rosemary Castorina<sup>1\*</sup>, Asa Bradman<sup>1</sup>, Andreas Sjödin<sup>2</sup>, Laura Fenster<sup>1</sup>,  
Richard S. Jones<sup>2</sup>, Kim Harley<sup>1</sup>, Ellen A. Eisen<sup>1,3</sup>, Brenda Eskenazi<sup>1</sup>

---

**19 pages, 4 tables, 3 figures**

**Authors' affiliation:**

<sup>1</sup> Center for Environmental Research and Children's Health (CERCH), School of Public Health, University of California, Berkeley, CA, USA

<sup>2</sup> Division of Laboratory Sciences, National Center for Environmental Health, Centers for Disease Control and Prevention, 4770 Buford Highway, NE Mail Stop F-17, Atlanta, GA 30341

<sup>3</sup> Division of Environmental Health, School of Public Health, UC Berkeley, CA USA

**\*Corresponding author:**

Rosemary Castorina, PhD

Center for Environmental Research and Children's Health (CERCH)

School of Public Health

University of California, Berkeley

1995 University Avenue, Suite 265

Berkeley, CA 94704

Phone: (510) 642-9075 Fax: (510) 642-9083

rcastori@berkeley.edu

## CONTENTS

- **Table S1.** Molecular weights of PBDE congeners (g/mol) (**page S3**)
- **Table S2.** Molar PBDE concentrations in CHAMACOS maternal prenatal and delivery serum samples (pmol/g lipid) (**page S4**)
- **Table S3.** Demographic, housing and diet information and total molar PBDE concentrations among pregnant women in the CHAMACOS cohort (pmol/g lipid) (n=416) (**pages S5 - S6**)
- **Description of serum PBDE congener analytical laboratory methods** (**pages S7**)
- **Tables S4a-S4d.** Results from multiple regression analyses of log-transformed PBDE congener levels (ng/g lipid) and exposure predictors in pregnant women (n=352) (**pages S8 - S11**)
- **Figure S1.** Total maternal PBDE levels by years residing in the U.S. (n=416) (**page S12**)
- **Figure S2a.** Plot of matched maternal prenatal (~26 weeks gestation) and delivery total serum PBDE levels (n=21) (sum of 10 congeners) (log-transformed) (**page S13**)
- **Figures S2b – S2e.** Plots of matched maternal prenatal (~26 weeks gestation) and delivery serum PBDE congener levels (n=21) (log-transformed) (**pages S14 – S17**)
- **Figure S3a.** Ratio of BDE-99 to BDE-47 by years residing in the U.S. (n=416) (**page S18**).
- **Figure S3b.** Ratio of BDE-99 to BDE-47 by years residing in the U.S. (truncated at 10 years; n=300) (**page S19**).

**Table S1.** Molecular weights of PBDE congeners (g/mol).

| <b>Congener</b> | <b>IUPAC Name</b>                           | <b>Molecular weight</b> |
|-----------------|---------------------------------------------|-------------------------|
| BDE-17          | 2,2', 4 - tribromodiphenyl ether            | 406.91                  |
| BDE-28          | 2,4,4' - tribromodiphenyl ether             | 406.90                  |
| BDE-47          | 2,2',4,4' - tetrabromodiphenyl ether        | 485.81                  |
| BDE-66          | 2,3',4,4' - tetrabromodiphenyl ether        | 485.81                  |
| BDE-85          | 2,2',3,4,4' - pentabromodiphenyl ether      | 564.69                  |
| BDE-99          | 2,2',4,4',5 - pentabromodiphenyl ether      | 564.71                  |
| BDE-100         | 2,2',4,4',6 - pentabromodiphenyl ether      | 564.71                  |
| BDE-153         | 2,2',4,4',5,5' - hexabromodiphenyl ether    | 643.61                  |
| BDE-154         | 2,2',4,4',5,6' - hexabromodiphenyl ether    | 643.60                  |
| BDE-183         | 2,2',3,4,4',5,6' - heptabromodiphenyl ether | 722.51                  |

**Table S2.** Molar PBDE concentrations in CHAMACOS maternal prenatal and delivery serum samples (pmol/g lipid).

|                                        | <b>n</b> | <b>LOD<sup>a</sup></b> | <b>DF (%)</b> | <b>Geo Mean (95% CI)</b> | <b>Min</b> | <b>25th</b> | <b>50th</b> | <b>75th</b> | <b>90th</b> | <b>Max</b> |
|----------------------------------------|----------|------------------------|---------------|--------------------------|------------|-------------|-------------|-------------|-------------|------------|
| <b>BDE-47</b>                          |          |                        |               |                          |            |             |             |             |             |            |
| Maternal prenatal (26 wk)              | 321      | 1.5                    | 99.7          | 30.6 (27.3, 34.2)        | <LOD       | 15.8        | 29.9        | 51.0        | 103.8       | 1567       |
| Maternal delivery                      | 116      | 0.3                    | 99.2          | 26.4 (22.1, 31.6)        | <LOD       | 13.9        | 25.9        | 47.5        | 81.6        | 455        |
| <b>BDE-99</b>                          |          |                        |               |                          |            |             |             |             |             |            |
| Maternal prenatal (26 wk)              | 321      | 0.4                    | 99.7          | 7.6 (6.8, 8.5)           | <LOD       | 4.0         | 6.7         | 11.4        | 22.5        | 527        |
| Maternal delivery                      | 116      | 0.3                    | 99.2          | 5.8 (4.8, 6.9)           | <LOD       | 2.7         | 5.3         | 10.8        | 18.5        | 162        |
| <b>BDE-100</b>                         |          |                        |               |                          |            |             |             |             |             |            |
| Maternal prenatal (26 wk)              | 321      | 0.4                    | 99.7          | 4.7 (4.2, 5.3)           | <LOD       | 2.6         | 4.3         | 7.4         | 14.9        | 245        |
| Maternal delivery                      | 116      | 0.3                    | 99.2          | 4.2 (3.6, 5.0)           | <LOD       | 2.3         | 4.3         | 7.8         | 12.3        | 52.1       |
| <b>BDE-153</b>                         |          |                        |               |                          |            |             |             |             |             |            |
| Maternal prenatal (26 wk)              | 321      | 0.4                    | 99.7          | 3.6 (3.2, 4.0)           | <LOD       | 2.0         | 3.1         | 5.7         | 11.5        | 150.5      |
| Maternal delivery                      | 116      | 0.3                    | 100           | 3.3 (2.8, 3.8)           | 0.7        | 1.7         | 3.5         | 5.8         | 9.5         | 24.1       |
| <b>Sum of 4 congeners<sup>b</sup></b>  |          |                        |               |                          |            |             |             |             |             |            |
| Maternal prenatal (26 wk)              | 321      | --                     | 100           | 47.8 (42.8, 53.2)        | 5.9        | 24.7        | 45.0        | 76.5        | 152.1       | 2489       |
| Maternal delivery                      | 116      | --                     | 100           | 41.0 (34.7, 48.5)        | 3.1        | 21.4        | 39.6        | 72.0        | 120.5       | 686        |
| <b>Sum of 10 congeners<sup>c</sup></b> |          |                        |               |                          |            |             |             |             |             |            |
| Maternal prenatal (26 wk)              | 321      | --                     | 100           | 52.3 (47.0, 58.2)        | 7.6        | 27.2        | 50.1        | 81.2        | 164.2       | 2657       |
| Maternal delivery                      | 116      | --                     | 100           | 45.5 (38.8, 53.5)        | 6.4        | 24.3        | 42.5        | 77.9        | 130.0       | 736        |

<sup>a</sup> Average of LODs (ng/g lipid).

<sup>b</sup> Molar sum of 4 PBDE congeners with DFs>95%: BDE-47; BDE-99; BDE-100; BDE-153.

<sup>c</sup> Molar sum of 10 PBDE congeners: BDE-17; BDE-28; BDE-47; BDE-66; BDE-85; BDE-99; BDE-100; BDE-153; BDE-154; BDE-183.

**Table S3.** Demographic, housing and diet information and total molar PBDE concentrations among pregnant women in the CHAMACOS cohort (n=416).

|                                    | <b>n (%)</b> | <b>Molar sum (pmol/g lipid)<br/>GeoMean (95% CI)<sup>a</sup></b> |
|------------------------------------|--------------|------------------------------------------------------------------|
| <b>Demographic information</b>     |              |                                                                  |
| Age categories                     |              |                                                                  |
| ≤25 years                          | 243 (58.4)   | 54.3 (48.3, 61.2)                                                |
| >25 years                          | 173 (41.6)   | 56.0 (48.6, 64.5)                                                |
| Country of birth                   |              |                                                                  |
| US Born                            | 57 (13.7)    | 99.4** (76.5, 129.2)                                             |
| Born in Mexico/other               | 359 (86.3)   | 50.1 (45.6, 55.0)                                                |
| Time residing in the U.S.          |              |                                                                  |
| ≤5 years                           | 224 (53.9)   | 44.6 (39.5, 50.5)                                                |
| 6 to 10 years                      | 83 (19.9)    | 59.5 (50.9, 69.4)                                                |
| 11+ years                          | 62 (14.9)    | 62.5 (50.3, 77.7)                                                |
| Entire life                        | 47 (11.3)    | 109.7** (81.0, 148.5)                                            |
| Years residing in the U.S.         |              |                                                                  |
| Pearson r                          | 416 (100)    | 0.33**                                                           |
| Education                          |              |                                                                  |
| ≤6 years school                    | 179 (43.0)   | 46.8 (41.4, 53.0)                                                |
| 7-12 years school                  | 151 (36.3)   | 57.4 (49.1, 67.0)                                                |
| High school grad +                 | 86 (20.7)    | 71.4* (57.4, 89.0)                                               |
| Poverty                            |              |                                                                  |
| Above poverty threshold            | 143 (36.7)   | 59.4 (49.9, 70.7)                                                |
| At or below poverty threshold      | 247 (63.3)   | 53.5 (48.1, 59.5)                                                |
| Pre-pregnancy BMI categories       |              |                                                                  |
| Under/Normal weight (<25)          | 164 (39.5)   | 47.8 (41.7, 54.8)                                                |
| Overweight/Obese (≥25)             | 251 (60.5)   | 60.4* (53.6, 68.1)                                               |
| Pre-pregnancy BMI                  |              |                                                                  |
| Pearson r                          | 415 (99.8)   | 0.15*                                                            |
| Weight gain during pregnancy (lbs) |              |                                                                  |
| Pearson r                          | 409 (98.3)   | -0.10*                                                           |
| Parity                             |              |                                                                  |
| 0 children                         | 151 (36.3)   | 49.6 (42.4, 58.2)                                                |
| 1 child                            | 128 (30.8)   | 56.4 (47.6, 66.9)                                                |
| ≥2 children                        | 137 (32.9)   | 60.2 (52.3, 69.3)                                                |

\* ANOVA p-value<0.05; \*\* p-value<0.001

<sup>a</sup> Geometric means and 95% confidence interval except when Pearson coefficient (r) is presented.

**Table S3 (cont).** Demographic, housing and diet information and total molar PBDE concentrations among pregnant women in the CHAMACOS cohort (n=416).

|                                         | n (%)      | Molar sum (pmol/g lipid)<br>GeoMean (95% CI) <sup>a</sup> |
|-----------------------------------------|------------|-----------------------------------------------------------|
| Breastfeeding history previous births   |            |                                                           |
| None                                    | 192 (46.2) | 53.3 (46.3, 61.4)                                         |
| <12 months                              | 118 (28.4) | 57.8 (49.7, 67.3)                                         |
| ≥12 months                              | 106 (25.5) | 55.2 (45.9, 66.3)                                         |
| Maternal smoking during pregnancy       |            |                                                           |
| No                                      | 393 (94.5) | 54.4 (49.6, 59.6)                                         |
| Yes                                     | 23 (5.5)   | 67.4 (43.9, 103.5)                                        |
| <b>Housing characteristics</b>          |            |                                                           |
| No. pieces of stuffed furniture in home |            |                                                           |
| 0                                       | 48 (12.7)  | 45.8 (33.5, 62.5)                                         |
| 1-2                                     | 239 (63.1) | 52.8 (47.2, 59.1)                                         |
| 3 +                                     | 92 (24.3)  | 67.8* (54.7, 84.1)                                        |
| Any carpet in the home                  |            |                                                           |
| No                                      | 29 (7.7)   | 54.9 (36.7, 82.2)                                         |
| Yes                                     | 350 (92.3) | 55.1 (49.9, 60.9)                                         |
| % of rooms with carpet                  |            |                                                           |
| Pearson r                               | 379 (91.1) | 0.04                                                      |
| Resident density                        |            |                                                           |
| <1 person per room                      | 39 (10.4)  | 65.4 (45.5, 93.8)                                         |
| ≥1 person per room                      | 337 (89.6) | 54.1 (49.0, 59.8)                                         |
| Quality of housekeeping                 |            |                                                           |
| Less clean                              | 21 (5.5)   | 49.4 (35.0, 69.5)                                         |
| Average                                 | 207 (54.6) | 58.2 (50.3, 67.4)                                         |
| Excellent                               | 151 (39.8) | 52.3 (45.9, 59.5)                                         |
| <b>Diet</b>                             |            |                                                           |
| Daily servings of dairy                 |            |                                                           |
| Pearson r                               | 416 (99.8) | -0.06                                                     |
| Daily servings of meat                  |            |                                                           |
| Pearson r                               | 416 (99.8) | 0.05                                                      |
| Total daily fat intake                  |            |                                                           |
| Pearson r                               | 393 (94.5) | -0.04                                                     |
| Consumption of fish                     |            |                                                           |
| ≤1 per month                            | 226 (56.2) | 55.6 (49.1, 62.9)                                         |
| >1 per month                            | 176 (43.8) | 54.3 (47.2, 62.4)                                         |

\* ANOVA or Pearson's correlation p-value<0.05; \*\* p-value<0.001

<sup>a</sup> Geometric means and 95% confidence interval except when Pearson coefficient (r) is presented.

## **Description of serum PBDE congener analytical laboratory methods**

The methods used by the CDC for serum PBDE analysis have been described previously (Sjödin et al. 2004). Briefly, serum samples were fortified with <sup>13</sup>C-labeled internal standards, and formic acid was added to the samples as a denaturant and the samples were finally diluted with water before solid phase extraction (SPE). Liquid handling before extraction was automated using a 215 Liquid Handler (Gilson Inc, Middleton, WI), and SPE was automated using the Rapid Trace SPE workstation (Caliper Life Sciences, Hopkinton, MA). Removal of coextracted lipids was performed on a two-layered cleanup cartridge packed in and SPE tube, containing silica (top layer) and a mixture of silica and sulfuric acid (bottom layer), using the SPE work station for automation

Final analytical determination of target analytes is performed by gas chromatography-isotope dilution high resolution mass spectrometry (GC-IDHRMS).

## **Reference**

Sjödin, A.; Jones, R.S.; Lapeza, C.R.; Focant, J.F.; McGahee, E.E.; Patterson, D.G, Jr. Semiautomated high-throughput extraction and cleanup method for the measurement of polybrominated diphenyl ethers, polybrominated biphenyls, and polychlorinated biphenyls in human serum. *Anal. Chem.* **2004**, *76*(7), 1921-1927.

**Table S4a.** Results from multiple regression analyses of log-transformed BDE-47 levels (ng/g lipid) and exposure predictors in pregnant women (n=352).

|                                                      | <b>% Change (95% CI)</b> | <b>p-value</b> |
|------------------------------------------------------|--------------------------|----------------|
| Years residing in the US (continuous)                | 4.2 (2.8, 5.5)           | <0.001         |
| Pre-pregnancy BMI (overweight/obese ( $\geq 25$ ))   | 21.7 (-2.0, 51.0)        | 0.08           |
| Weight gain during pregnancy (kgs)                   | -0.8 (-2.6, 0.9)         | 0.35           |
| No. pieces of stuffed furniture in home ( $\geq 3$ ) | 23.9 (-2.0, 56.8)        | 0.05           |
| SES (at or below poverty threshold)                  | -2.5 (-20.9, 20.1)       | 0.81           |

Model R-squared=0.13



**Table S4b.** Results from multiple regression analyses of log-transformed BDE-99 levels (ng/g lipid) and exposure predictors in pregnant women (n=352).

|                                                      | <b>% Change (95% CI)</b> | <b>p-value</b> |
|------------------------------------------------------|--------------------------|----------------|
| Years residing in the US (continuous)                | 3.1 (1.7, 4.5)           | <0.001         |
| Pre-pregnancy BMI (overweight/obese ( $\geq 25$ ))   | 23.4 (-1.1, 54.1)        | 0.06           |
| Weight gain during pregnancy (kgs)                   | -0.6 (-2.4, 1.2)         | 0.52           |
| No. pieces of stuffed furniture in home ( $\geq 3$ ) | 33.3 (4.7, 69.6)         | 0.02           |
| SES (at or below poverty threshold)                  | -0.5 (-19.8, 23.2)       | 0.96           |

Model R-squared=0.10

**Table S4c.** Results from multiple regression analyses of log-transformed BDE-100 levels (ng/g lipid) and exposure predictors in pregnant women (n=352).

|                                                      | <b>% Change (95% CI)</b> | <b>p-value</b> |
|------------------------------------------------------|--------------------------|----------------|
| Years residing in the US (continuous)                | 4.7 (3.3, 6.0)           | <0.001         |
| Pre-pregnancy BMI (overweight/obese ( $\geq 25$ ))   | 12.8 (-8.5, 39.0)        | 0.26           |
| Weight gain during pregnancy (kgs)                   | -1.3 (-3.0, 0.4)         | 0.14           |
| No. pieces of stuffed furniture in home ( $\geq 3$ ) | 26.7 (0.9, 59.0)         | 0.04           |
| SES (at or below poverty threshold)                  | 2.2 (-16.5, 25.0)        | 0.83           |

Model R-squared=0.16

**Table S4d.** Results from multiple regression analyses of log-transformed BDE-153 levels (ng/g lipid) and exposure predictors in pregnant women (n=352).

|                                                      | <b>% Change (95% CI)</b> | <b>p-value</b> |
|------------------------------------------------------|--------------------------|----------------|
| Years residing in the US (continuous)                | 5.4 (4.2, 6.7)           | <0.001         |
| Pre-pregnancy BMI (overweight/obese ( $\geq 25$ ))   | -8.6 (-24.4, 10.6)       | 0.36           |
| Weight gain during pregnancy (kgs)                   | -2.1 (-3.6, -0.5)        | 0.009          |
| No. pieces of stuffed furniture in home ( $\geq 3$ ) | 27.6 (3.7, 57.0)         | 0.02           |
| SES (at or below poverty threshold)                  | 4.9 (-12.7, 26.1)        | 0.61           |

Model R-squared=0.22

**Figure S1.** Total maternal PBDE levels by years residing in the U.S. (n=416).

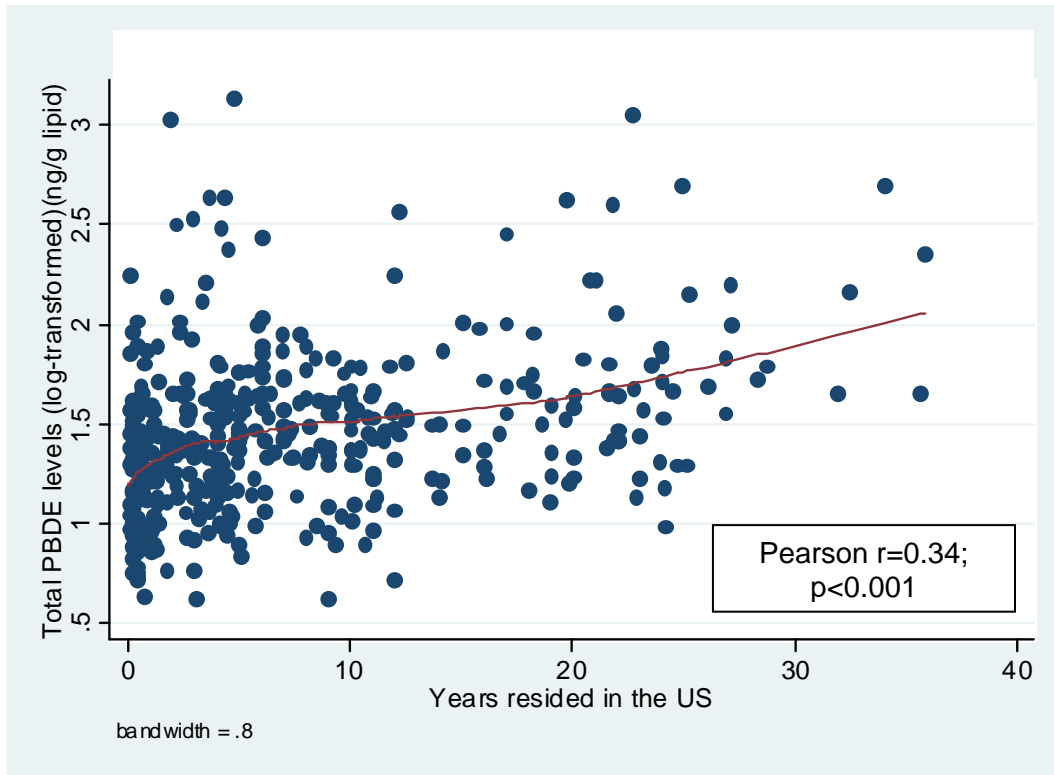

**Figure S2a.** Plot of matched maternal prenatal (~26 weeks gestation) and delivery total serum PBDE levels (n=21) (sum of 10 congeners) (log-transformed).

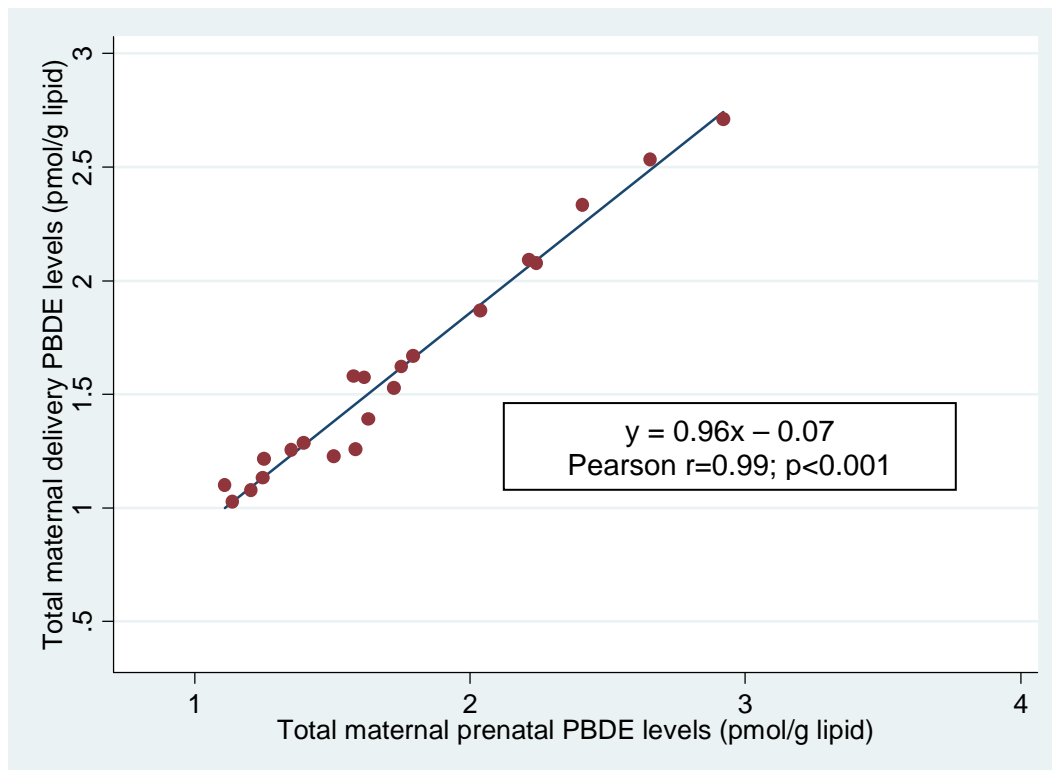

**Figure S2b.** Plot of matched maternal prenatal (~26 weeks gestation) and delivery serum BDE-47 levels (n=21) (log-transformed).

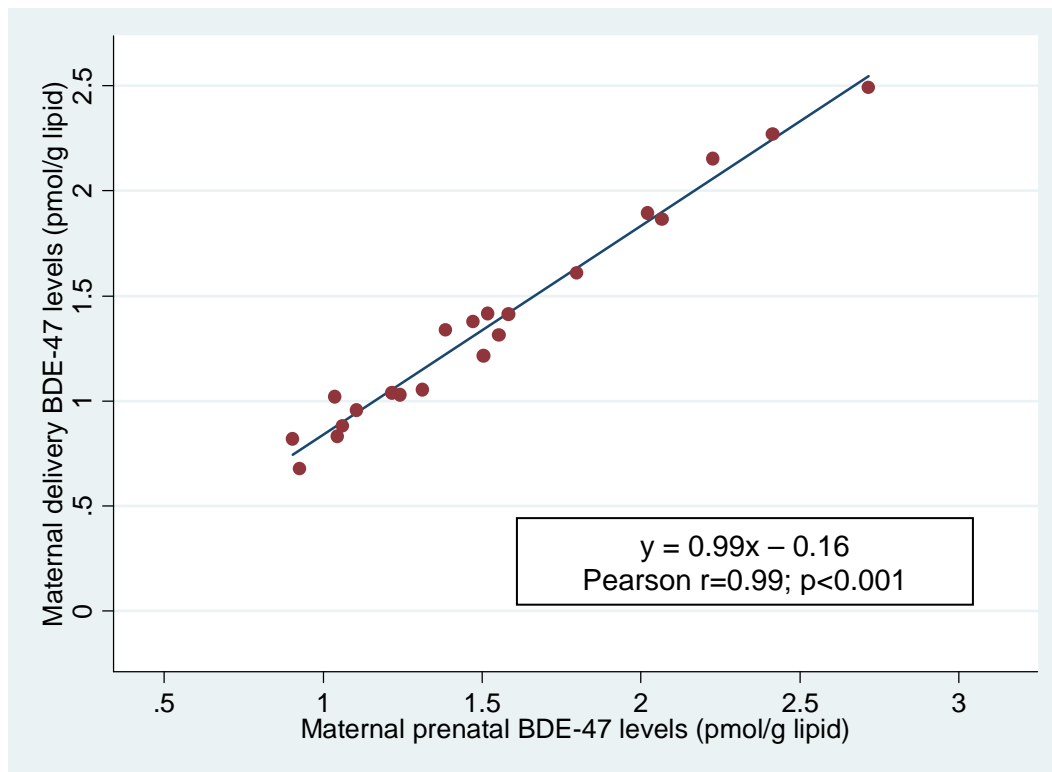

**Figure S2c.** Plot of matched maternal prenatal (~26 weeks gestation) and delivery serum BDE-99 levels (n=21) (log-transformed).

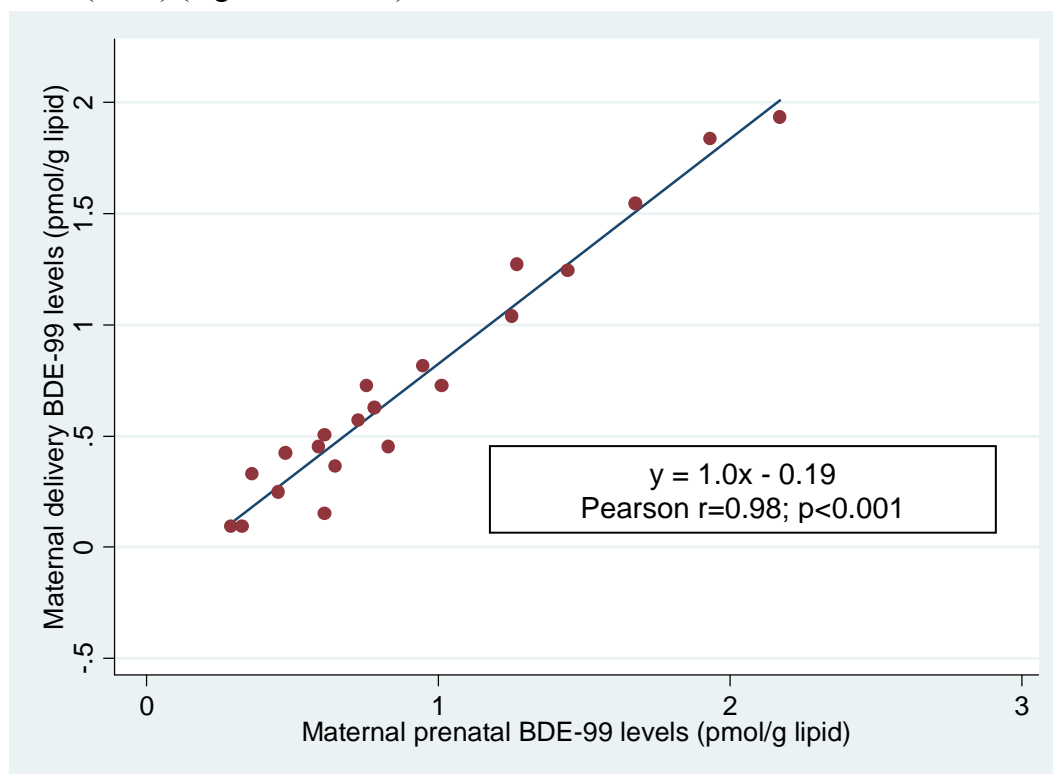

**Figure S2d.** Plot of matched maternal prenatal (~26 weeks gestation) and delivery serum BDE-100 levels (n=21) (log-transformed).

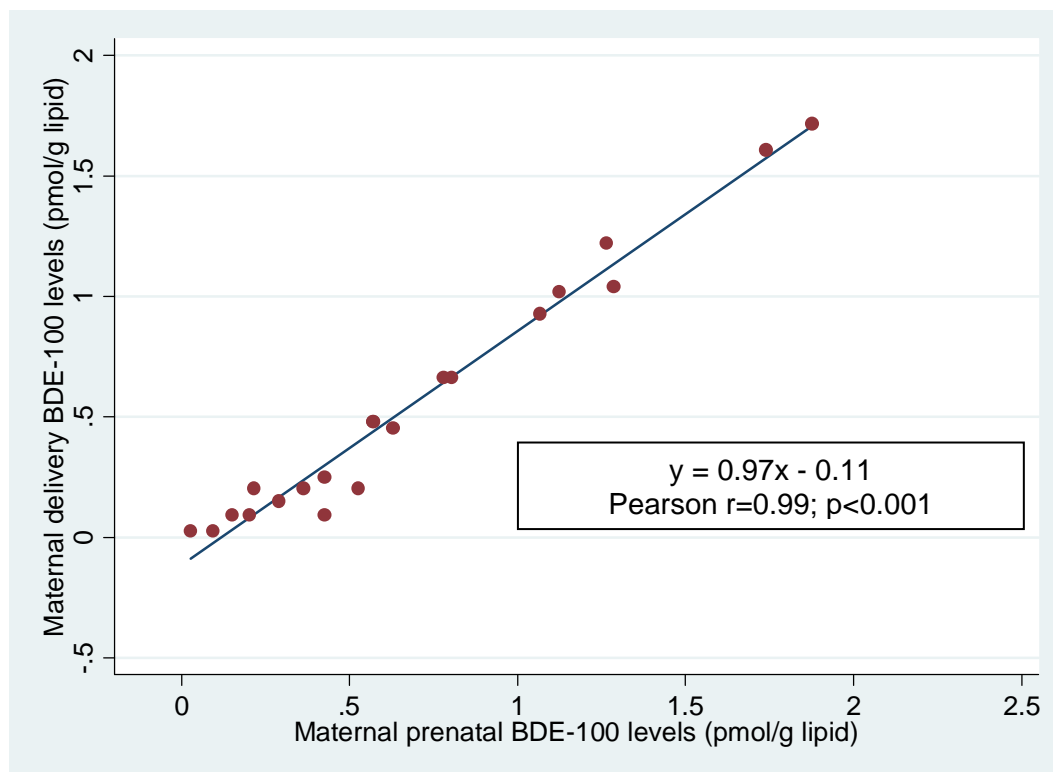



**Figure S2e.** Plot of matched maternal prenatal (~26 weeks gestation) and delivery total serum BDE-153 (n=21) (log-transformed).

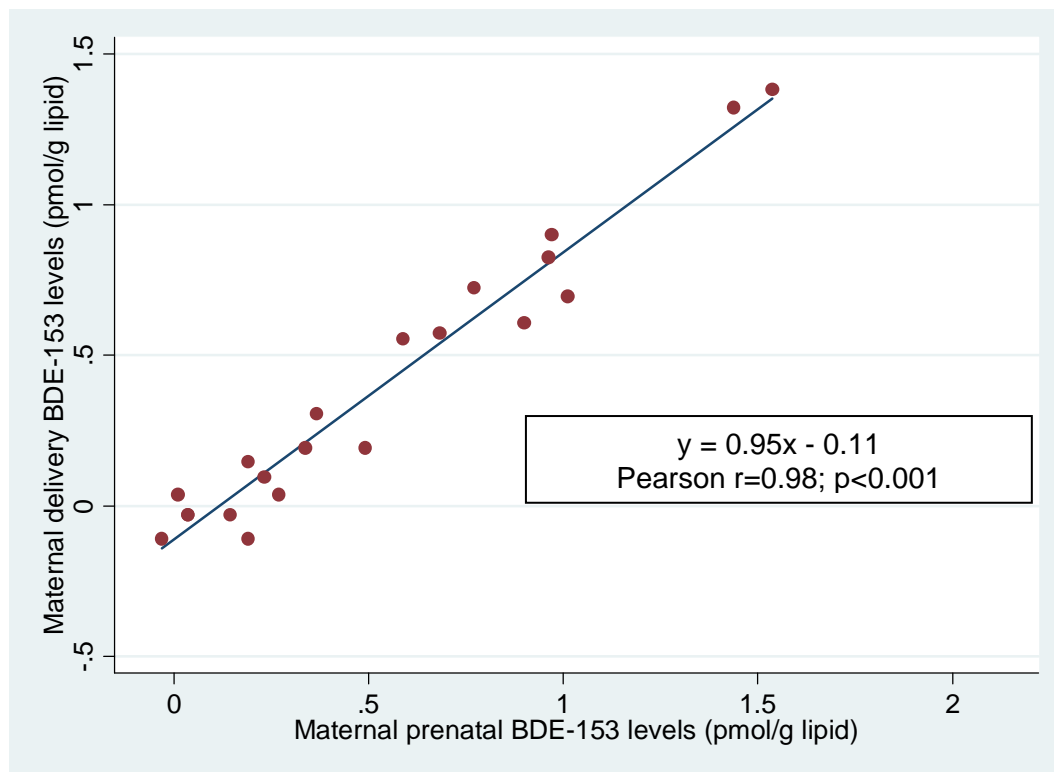

**Figure S3a.** Ratio of BDE-99 to BDE-47 by years residing in the U.S. (n=416).

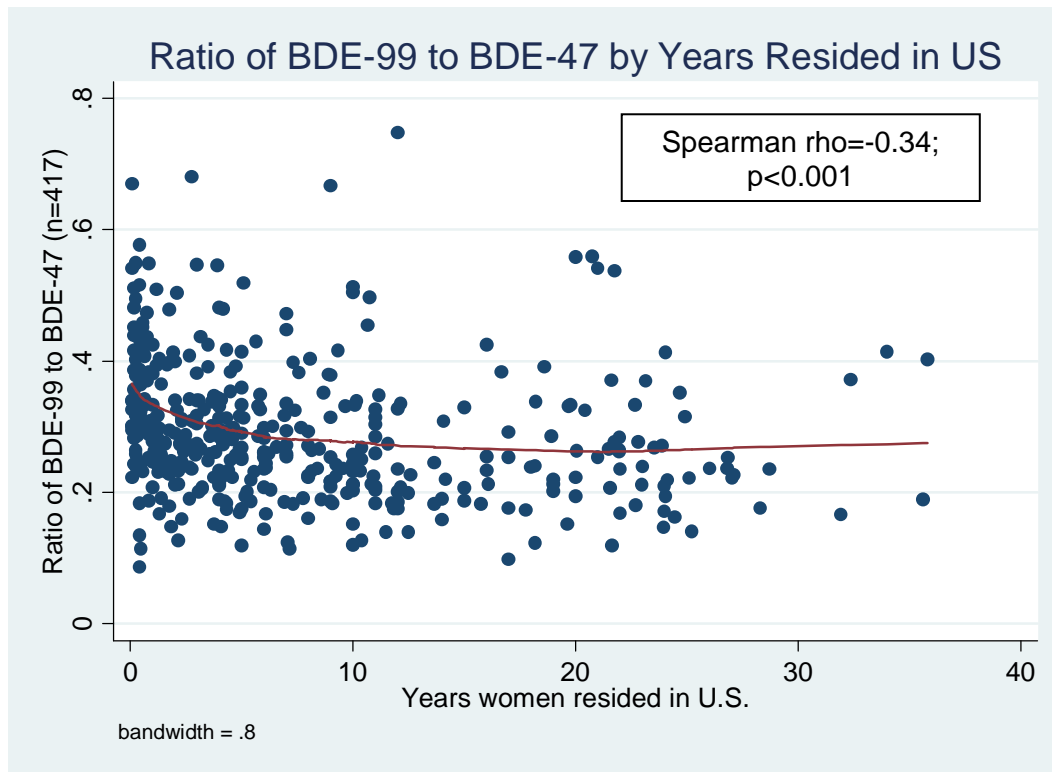

*Dropping 3 observations with ratio's >1*

**Figure S3b.** Ratio of BDE-99 to BDE-47 by years residing in the U.S. (truncated at 10 years; n=300).

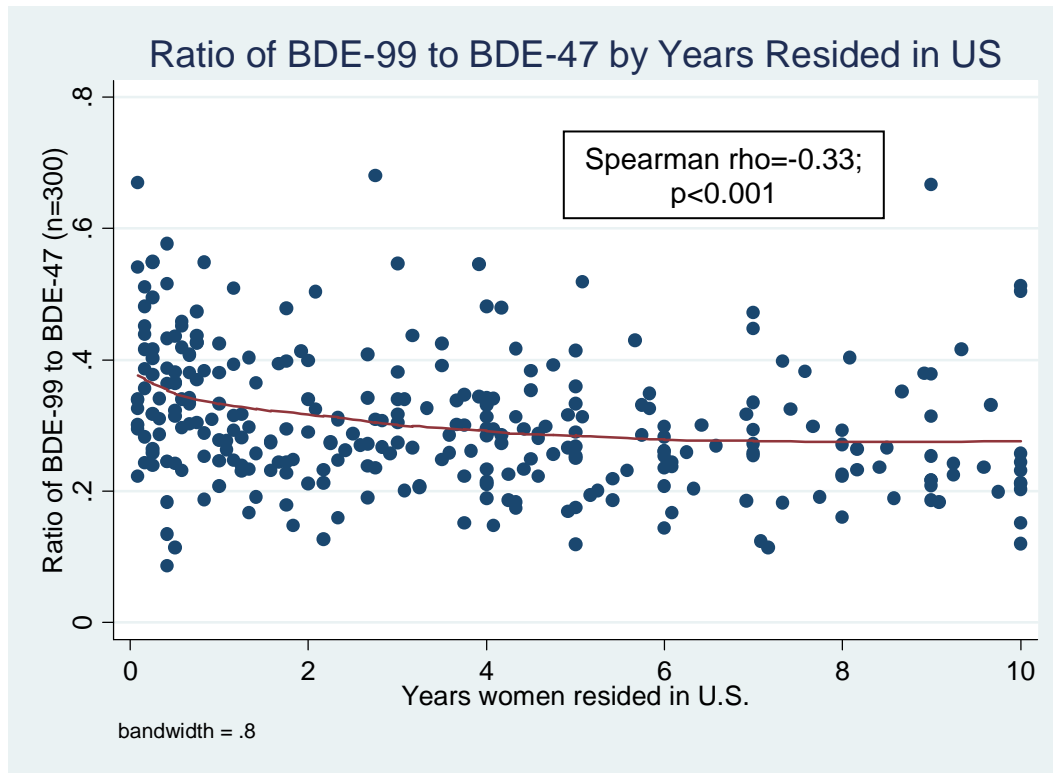

*Dropping 3 observations with ratio's >1*
